# Supplementary material for: Technical note: Testing the connection between hillslope-scale runoff fluctuations and streamflow hydrographs at the outlet of large river basins
Source: Copernicus journal article supplement (doi:10.5194/hess-28-1373-2024), 2024-03-26
Supplement: Supplementary file 1 [file hess-28-1373-2024-supplement.pdf]

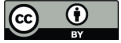

*Supplement of*

**Technical note: Testing the connection between hillslope-scale runoff fluctuations and streamflow hydrographs at the outlet of large river basins**

**Ricardo Mantilla et al.**

*Correspondence to:* Ricardo Mantilla ([ricardo.mantilla@umanitoba.ca](mailto:ricardo.mantilla@umanitoba.ca))

The copyright of individual parts of the supplement might differ from the article licence.

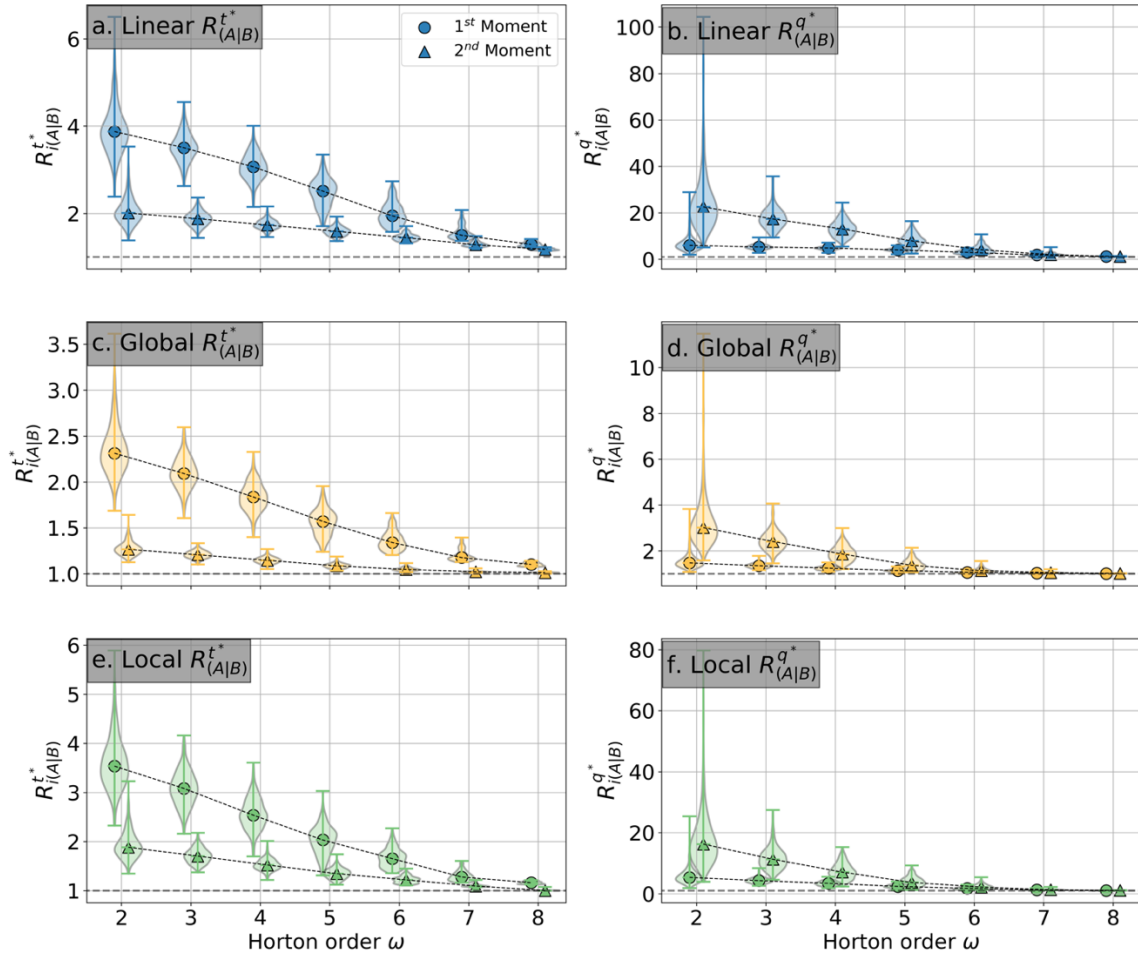

**Figure S1. Convergence of hydrographs to a common hydrograph for all links in the river network. The Violin plot represent the distribution of moment ratios for time ( $t^*$ ) on the left panels and discharge ( $q^*$ ) on the right panels for hydrographs at the outlet of catchments of different Horton Order in the basin.**

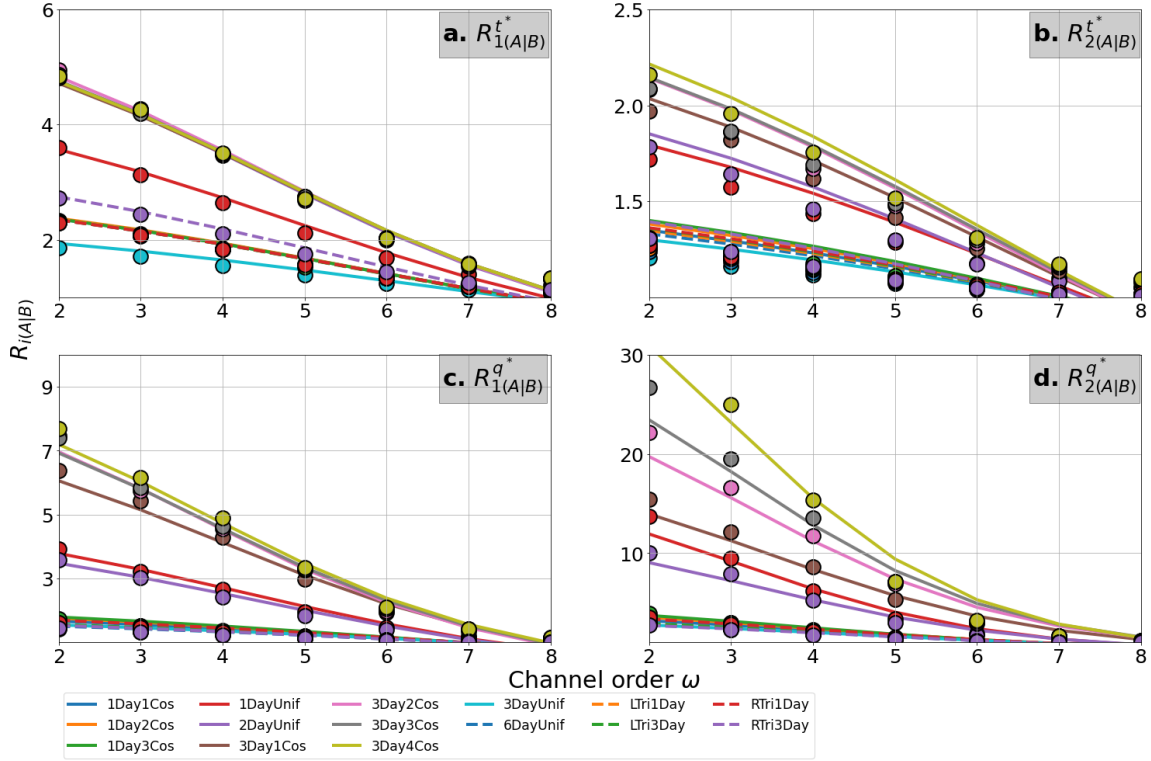

Figure S2. Convergence of moments to the Dirac case using global self-similar non-linear routing.

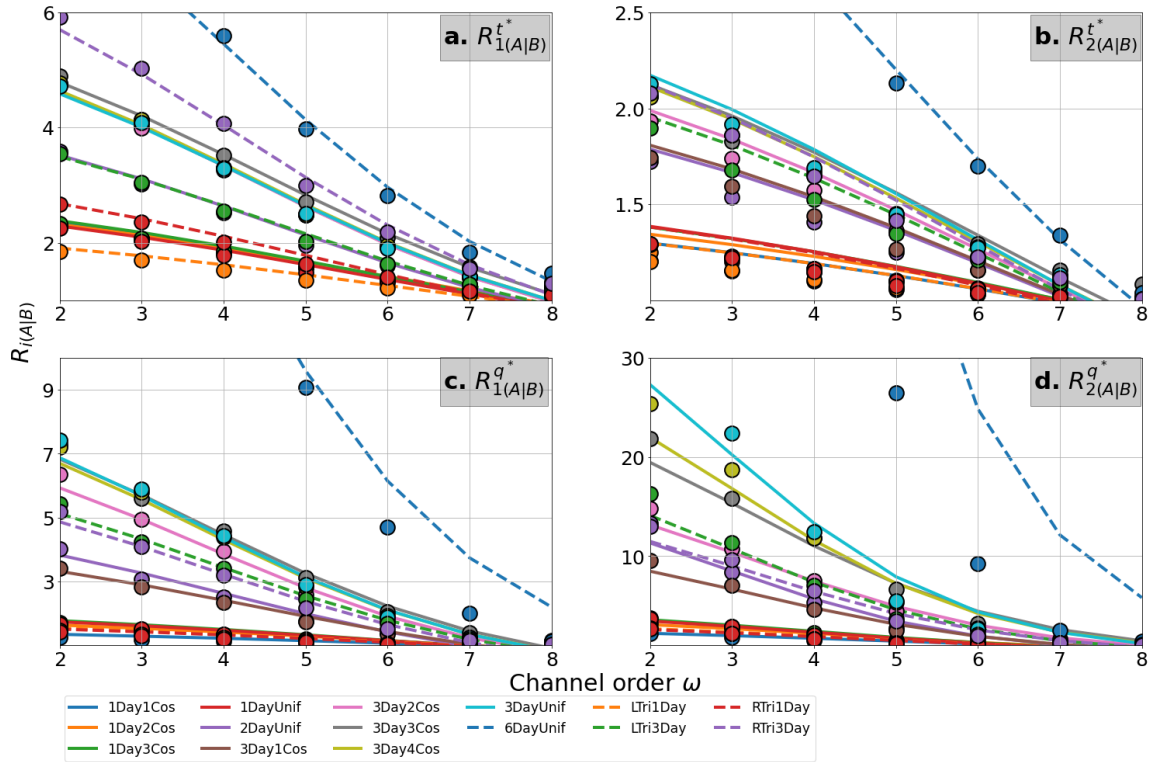

Figure S3. Convergence of moments to the Dirac case using local self-similar non-linear routing.
